# Supplementary material
Source: Copernicus journal article supplement (doi:10.5194/egusphere-2026-830)
Supplement: Supplementary file 1 [file egusphere-2026-830-supplement.pdf]

# ***Supplementary Material: Seasonal dynamics of eutrophication in human-impacted rivers***

Alexander Hubig<sup>1</sup>, Pia Ebeling<sup>1</sup>, Daniel Graeber<sup>2</sup>, Ulrike Scharfenberger<sup>2</sup>, and Andreas Musolff<sup>1</sup>

<sup>1</sup>Department of Hydrogeology, Helmholtz-Centre for Environmental Research - UFZ, Leipzig, Germany

<sup>2</sup>Department of Aquatic Ecosystem Analysis, Helmholtz-Centre for Environmental Research - UFZ, Magdeburg, Germany

**Correspondence:** Alexander Hubig (alexander.hubig@ufz.de)

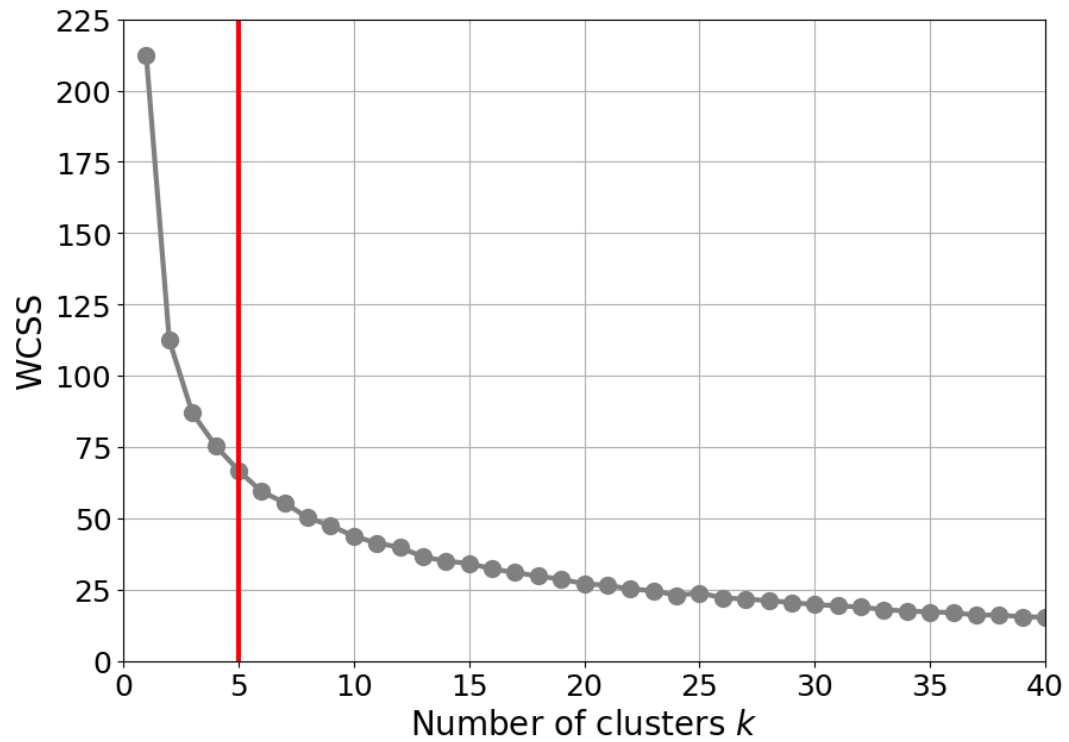

**Figure S1.** Elbow plot showing the within-cluster sum of squares (WCSS) for different values number of clusters ( $k$ ). By visual inspection of the plot, we decided for  $k = 5$  as the optimal number of clusters for our  $\alpha_{realized}$  dataset.

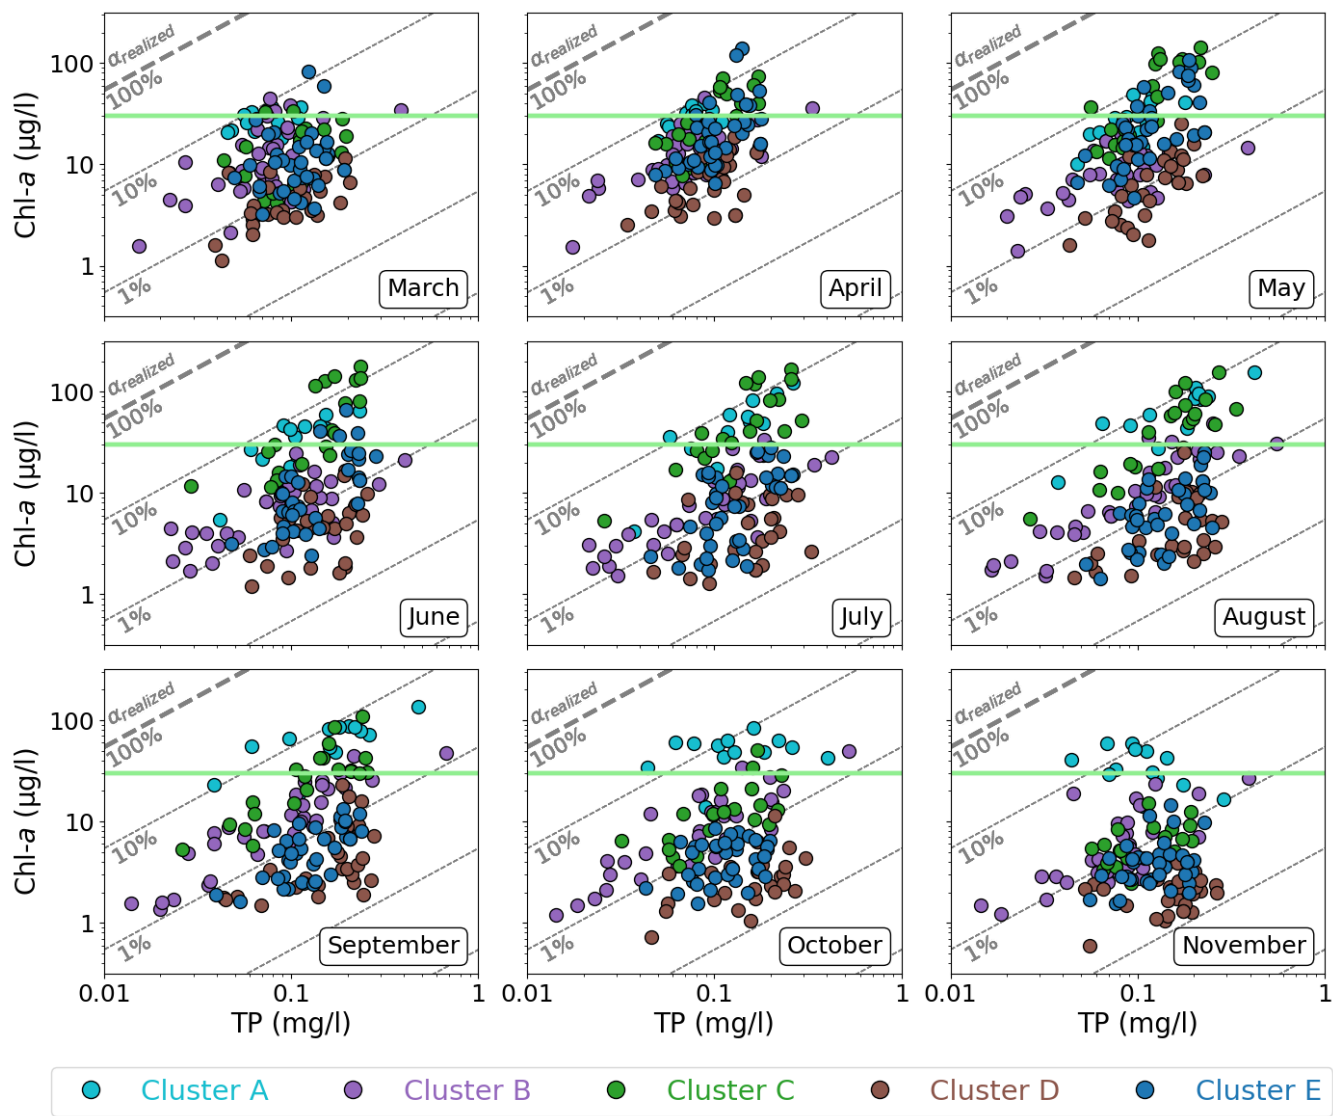

**Figure S2.** Monthly scatter plots of TP and Chl-a sorted by clusters with the dotted background lines indicating  $\alpha_{realized}$ . The green lines mark a threshold of 30 µg/l for phytoplankton blooms (Dodds et al., 1998).

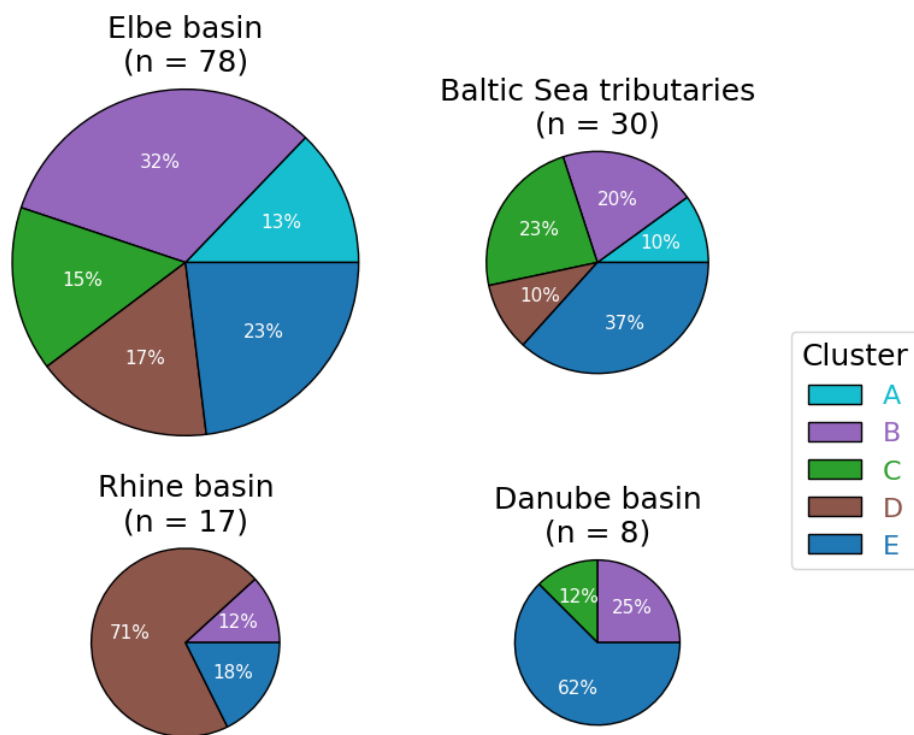

**Figure S3.** Fraction of the five cluster in stations of the Elbe basin, the Baltic Sea tributaries, the Rhine basin, and the Danube basin.

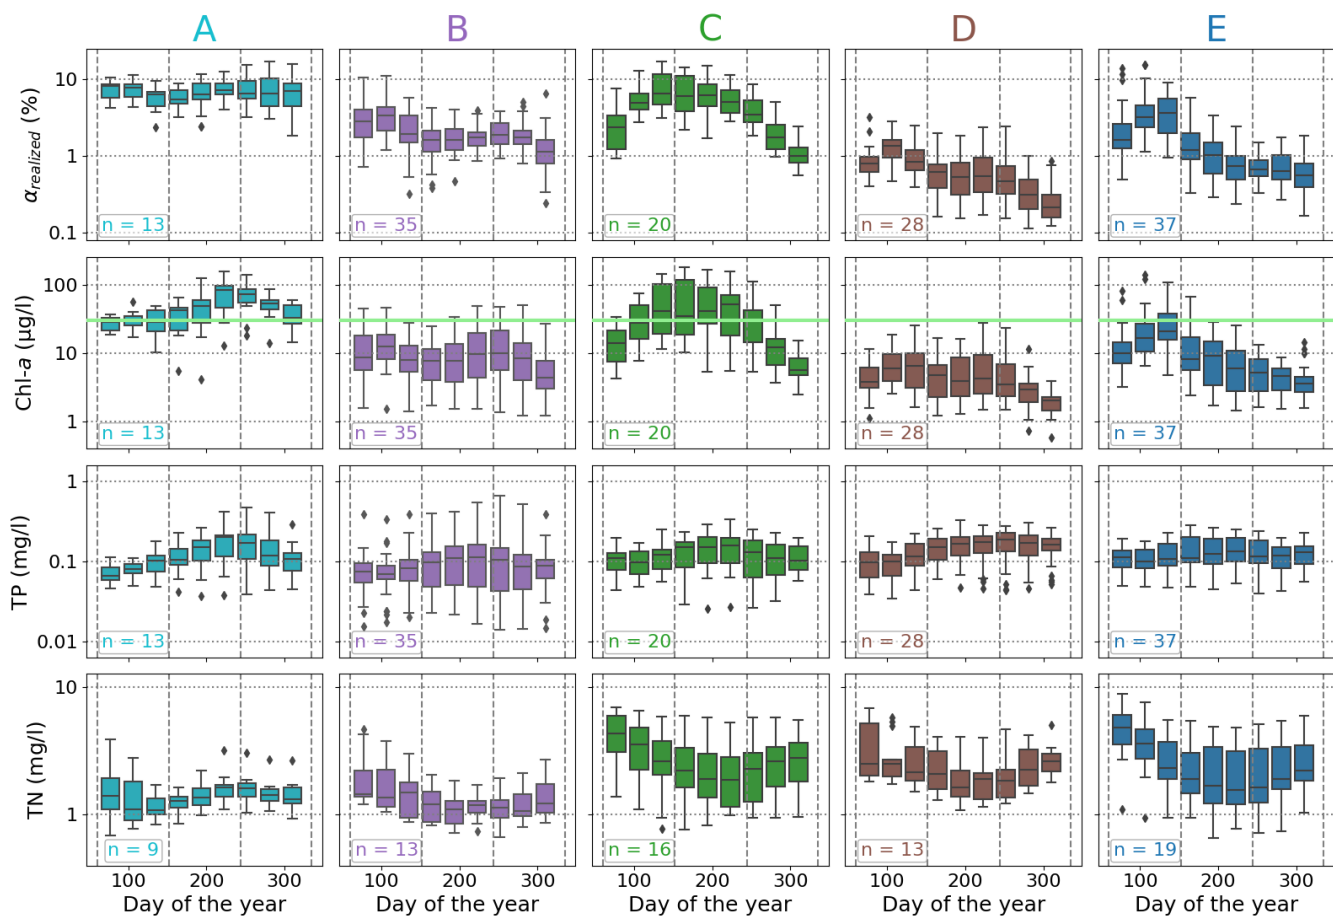

**Figure S4.** From top row to bottom row: Cluster-wise boxplots of  $\alpha_{realized}$  and the concentrations of Chl-*a*, TP, and TN with one boxplot per month. The green line in the Chl-*a* panels marks a threshold of 30  $\mu\text{g/l}$  for phytoplankton blooms (Dodds et al., 1998).

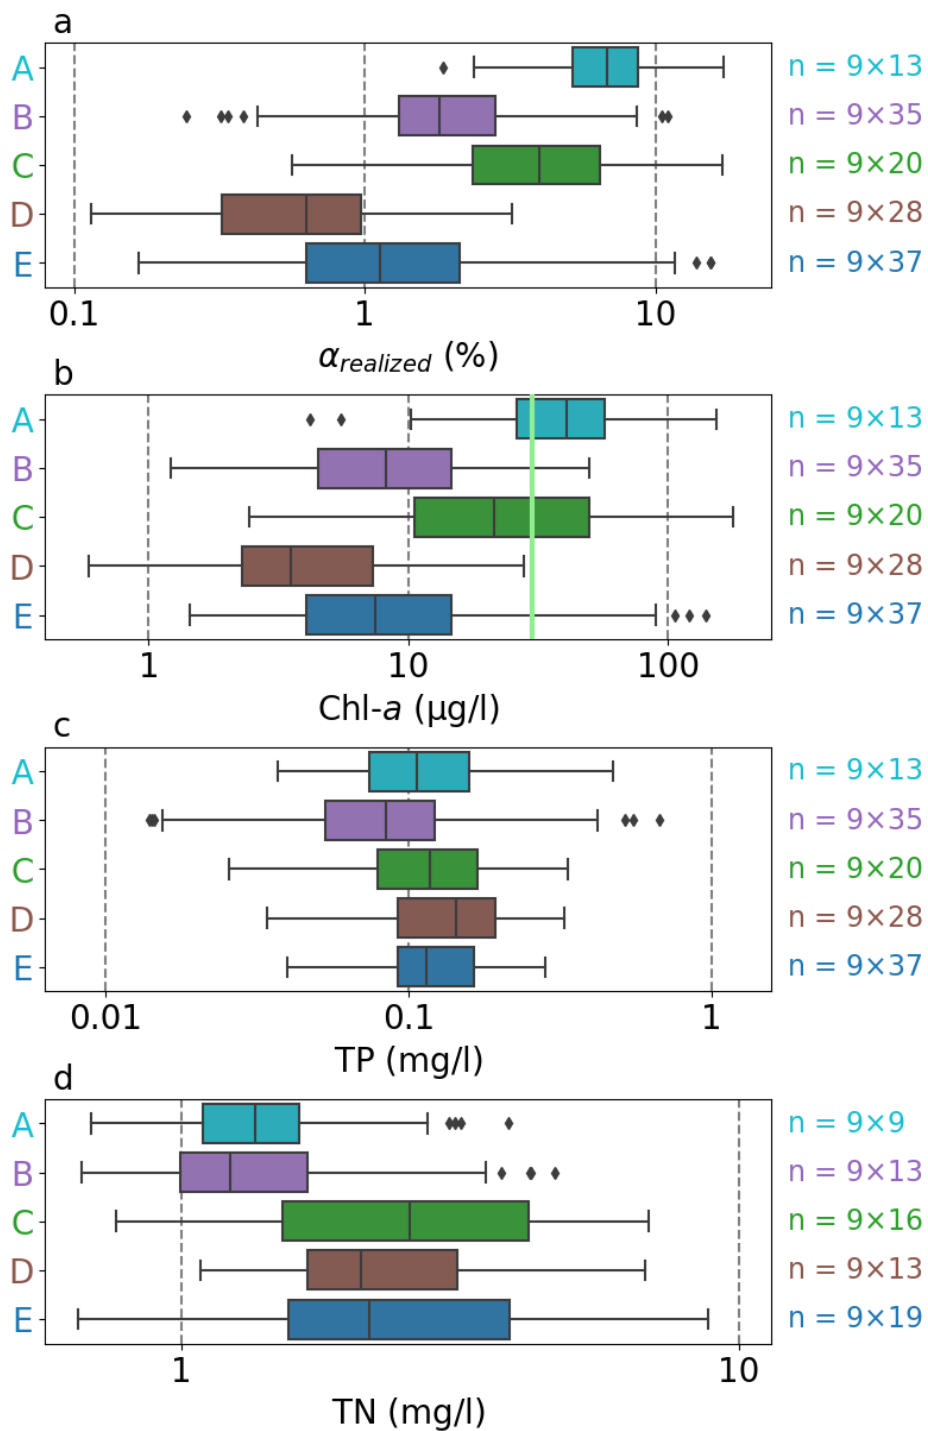

**Figure S5.** From top row to bottom row: Cluster-wise boxplots of  $\alpha_{realized}$  and the concentrations of Chl-a, TP, and TN across all months. The green line in the Chl-a panels marks a threshold of 30  $\mu\text{g/l}$  for phytoplankton blooms (Dodds et al., 1998).

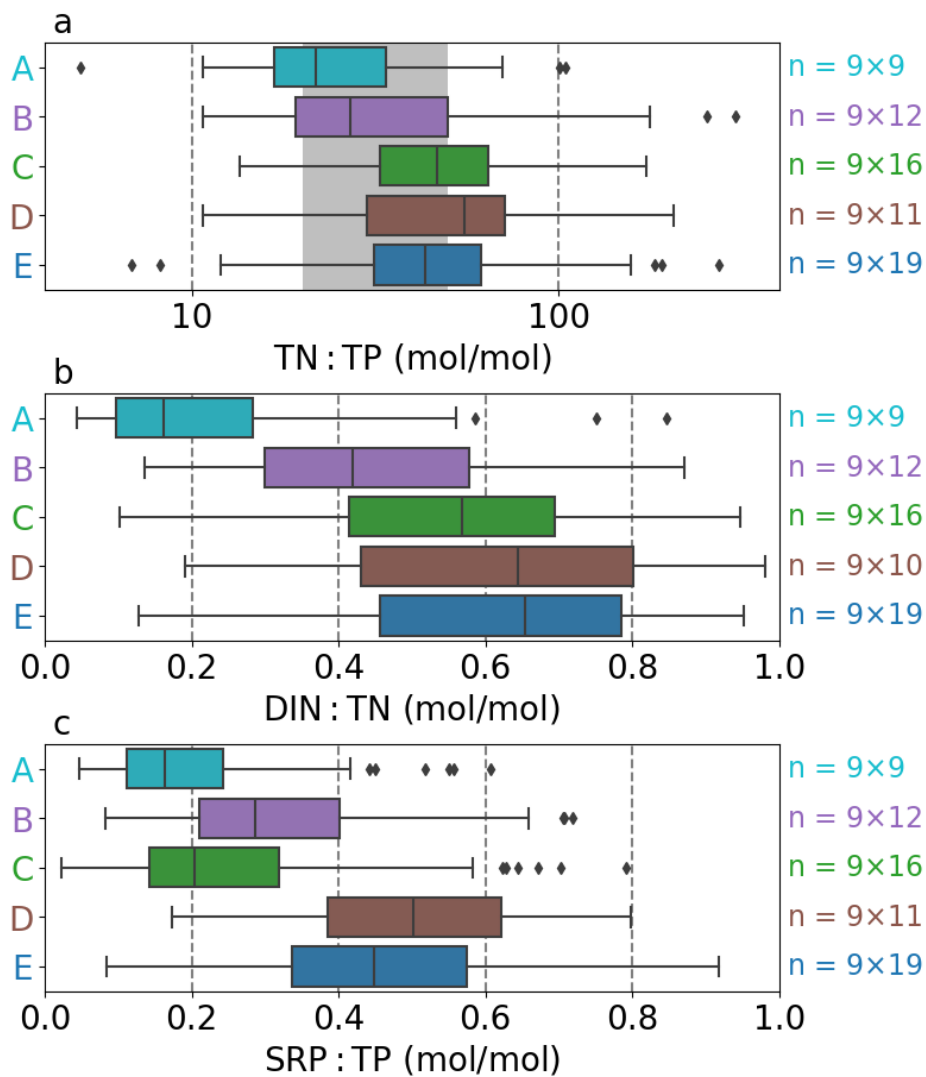

**Figure S6.** From top row to bottom row: Cluster-wise boxplots of the ratios TN:TP, DIN:TN, and SRP:TP across all months. In the top row, the gray area marks the range  $20 \leq \text{TN:TP} \leq 50$  indicating N and P co-deficiency while  $\text{TN:TP} < 20$  indicates N deficiency only and  $\text{TN:TP} > 50$  indicates P deficiency only (Guildford and Hecky, 2000; Graeber et al., 2024).

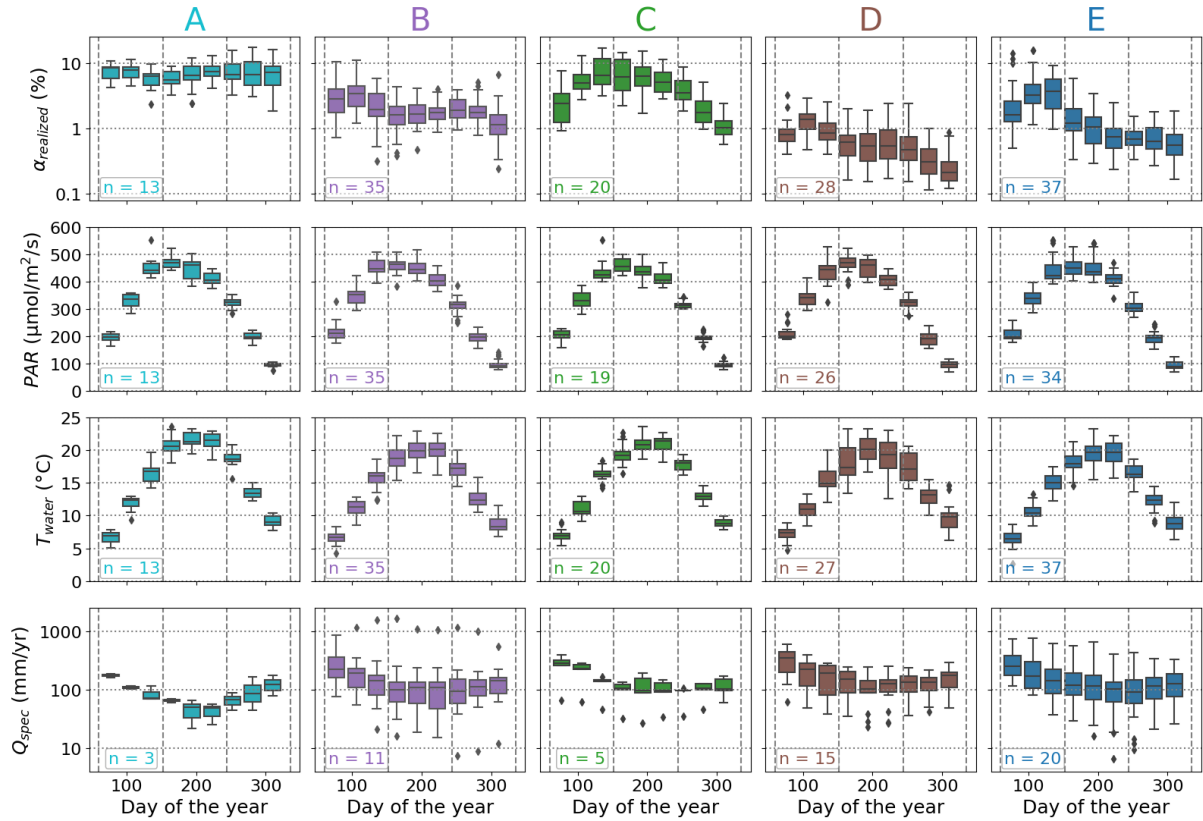

**Figure S7.** From top row to bottom row: Cluster-wise boxplots of the degree of realized eutrophication  $\alpha_{realized}$ , photosynthetically active radiation  $PAR$ , water temperature  $T_{water}$ , and specific discharge  $Q_{spec}$  with one boxplot per month. For comparability between stations, discharge  $Q$  was converted into specific discharge  $Q_{spec}$  via  $Q_{spec} = Q/A$ . The catchment area  $A$  was obtained from HydroRIVERS (Lehner and Grill, 2013) for the nearest reach to each station. The number of included stations are indicated for each panel.

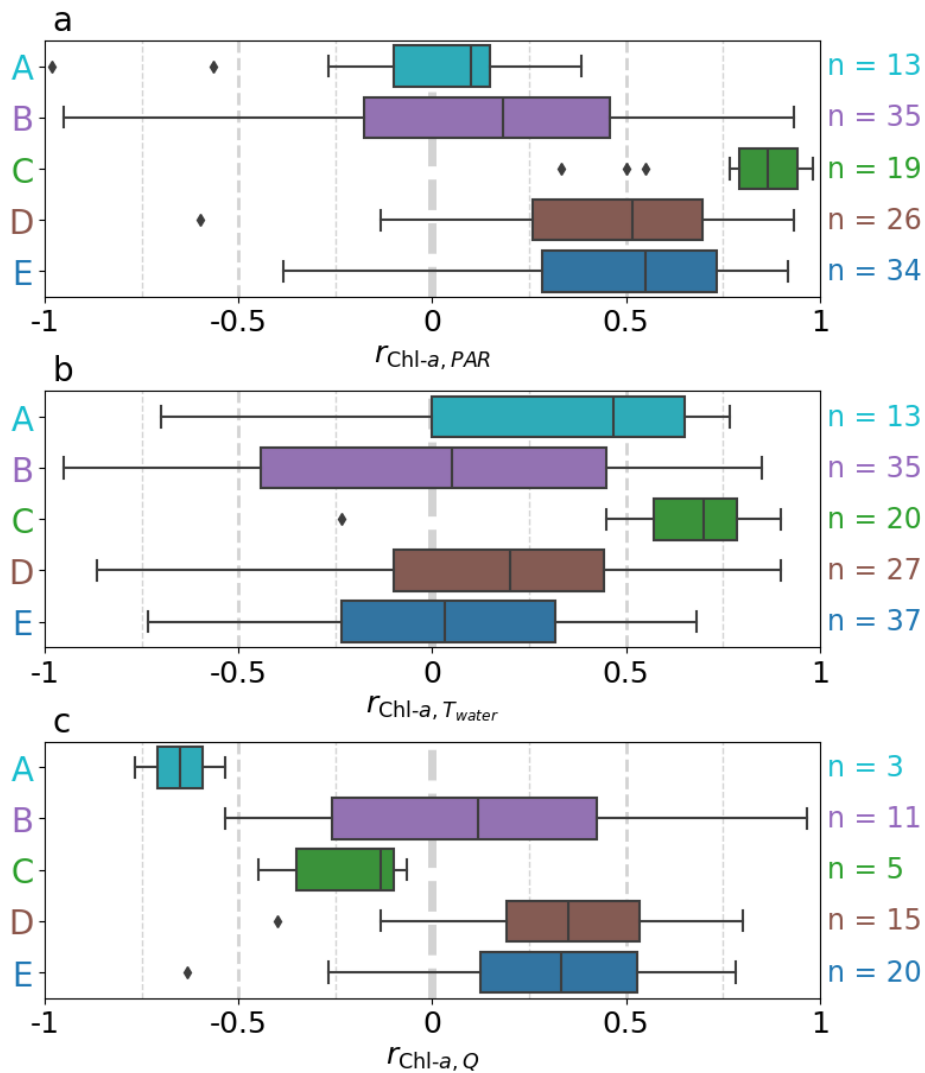

**Figure S8.** Cluster-wise distribution of the Spearman rank correlation coefficients at single stations: (a) between Chl-*a* and *PAR*, (b) between Chl-*a* and *T<sub>water</sub>*, and (c) between Chl-*a* and *Q*.

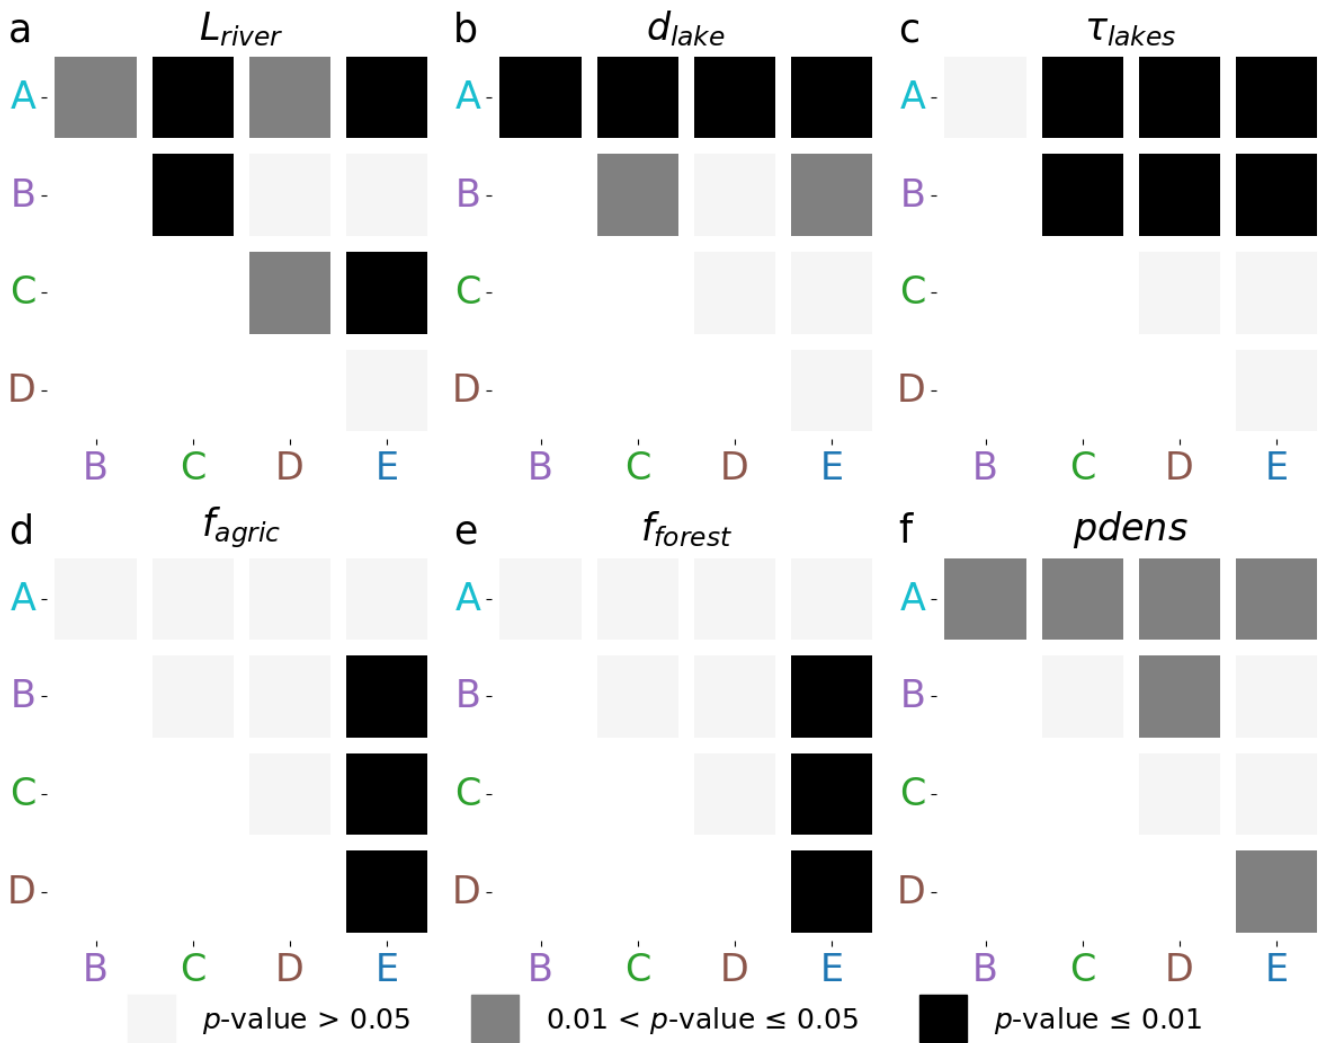

**Figure S9.** Cluster comparison of the river network properties  $L_{river}$ ,  $d_{lake}$ , and  $\tau_{lakes}$  and catchment characteristics  $f_{forest}$ ,  $f_{agric}$ , and  $pdens$ . Grey and black squares indicate significant differences in the cluster-wise distributions of the parameters (Figure 7) assessed by Mann-Whitney U tests (gray:  $0.01 \leq p\text{-value} < 0.05$ ; black:  $p\text{-value} < 0.01$ ).

**Table S1.** Cluster-wise and monthly fractions of stations in the P deficiency range (TN:TP > 50), the N and P co-deficiency range ( $20 \leq \text{TN:TP} \leq 50$ ), or the N deficiency range (TN:TP < 20).

| Cluster | Deficiency | All-year | March  | April  | May   | June  | July  | August | September | October | November |
|---------|------------|----------|--------|--------|-------|-------|-------|--------|-----------|---------|----------|
| All     | P          | 35.6%    | 80.0%  | 72.9%  | 44.3% | 20.0% | 11.4% | 8.6%   | 12.9%     | 32.9%   | 37.1%    |
|         | N + P      | 45.7%    | 18.6%  | 25.7%  | 52.9% | 62.9% | 58.6% | 51.4%  | 50.0%     | 40.0%   | 51.4%    |
|         | N          | 18.7%    | 1.4%   | 1.4%   | 2.9%  | 17.1% | 30.0% | 40.0%  | 37.1%     | 27.1%   | 11.4%    |
| A       | P          | 7.4%     | 33.3%  | 33.3%  | 0.0%  | 0.0%  | 0.0%  | 0.0%   | 0.0%      | 0.0%    | 0.0%     |
|         | N + P      | 46.9%    | 55.6%  | 55.6%  | 77.8% | 55.6% | 33.3% | 22.2%  | 33.3%     | 44.4%   | 44.4%    |
|         | N          | 45.7%    | 11.1%  | 11.1%  | 22.2% | 44.4% | 66.7% | 77.8%  | 66.7%     | 55.6%   | 55.6%    |
| B       | P          | 24.8%    | 61.5%  | 38.5%  | 30.8% | 23.1% | 15.4% | 7.7%   | 7.7%      | 23.1%   | 15.4%    |
|         | N + P      | 44.4%    | 38.5%  | 61.5%  | 69.2% | 46.2% | 38.5% | 23.1%  | 30.8%     | 23.1%   | 69.2%    |
|         | N          | 30.8%    | 0.0%   | 0.0%   | 0.0%  | 30.8% | 46.2% | 69.2%  | 61.5%     | 53.8%   | 15.4%    |
| C       | P          | 44.4%    | 100%   | 93.8%  | 56.2% | 18.8% | 6.2%  | 12.5%  | 12.5%     | 37.5%   | 62.5%    |
|         | N + P      | 43.1%    | 0.0%   | 6.2%   | 43.8% | 75.0% | 56.2% | 50.0%  | 68.8%     | 50.0%   | 37.5%    |
|         | N          | 12.5%    | 0.0%   | 0.0%   | 0.0%  | 6.2%  | 37.5% | 37.5%  | 18.8%     | 12.5%   | 0.0%     |
| D       | P          | 50.4%    | 100.0% | 100.0% | 61.5% | 38.5% | 23.1% | 15.4%  | 23.1%     | 46.2%   | 46.2%    |
|         | N + P      | 37.6%    | 0.0%   | 0.0%   | 38.5% | 61.5% | 69.2% | 61.5%  | 30.8%     | 23.1%   | 53.8%    |
|         | N          | 12.0%    | 0.0%   | 0.0%   | 0.0%  | 0.0%  | 7.7%  | 23.1%  | 46.2%     | 30.8%   | 0.0%     |
| E       | P          | 38.6%    | 84.2%  | 78.9%  | 52.6% | 15.8% | 10.5% | 5.3%   | 15.8%     | 42.1%   | 42.1%    |
|         | N + P      | 53.8%    | 15.8%  | 21.1%  | 47.4% | 68.4% | 78.9% | 78.9%  | 68.4%     | 52.6%   | 52.6%    |
|         | N          | 7.6%     | 0.0%   | 0.0%   | 0.0%  | 15.8% | 10.5% | 15.8%  | 15.8%     | 5.3%    | 5.3%     |

**Table S2.** Overview of correlation coefficients of Chl-*a* and the nutrients TN and TP.

| Parameter      | Cluster | Min.  | 25-p  | Median | 75-p  | Max. | Fraction of significant correlations ( $n_{sign.}/n_{total}$ ) |
|----------------|---------|-------|-------|--------|-------|------|----------------------------------------------------------------|
| $r_{Chl-a,TP}$ | A       | -0.18 | 0.60  | 0.70   | 0.83  | 0.87 | 61.5% (8/13)                                                   |
|                | B       | -0.72 | -0.20 | 0.33   | 0.67  | 0.80 | 34.3% (12/35)                                                  |
|                | C       | -0.02 | 0.33  | 0.57   | 0.74  | 0.88 | 40.0% (8/20)                                                   |
|                | D       | -0.83 | -0.40 | -0.09  | 0.19  | 0.52 | 7.1% (2/28)                                                    |
|                | E       | -0.73 | -0.43 | 0.00   | 0.42  | 0.78 | 10.8% (4/37)                                                   |
| $r_{Chl-a,TN}$ | A       | -0.16 | 0.45  | 0.68   | 0.82  | 0.87 | 55.6% (5/9)                                                    |
|                | B       | -0.80 | -0.08 | 0.12   | 0.42  | 0.63 | 7.7% (1/13)                                                    |
|                | C       | -0.82 | -0.47 | -0.15  | -0.02 | 0.32 | 18.8% (3/16)                                                   |
|                | D       | -0.88 | -0.35 | -0.15  | 0.42  | 0.70 | 38.5% (5/13)                                                   |
|                | E       | -0.42 | -0.05 | 0.51   | 0.69  | 0.87 | 35.0% (7/20)                                                   |

**Table S3.** Overview of correlation coefficients of  $\alpha_{realized}$  and the physical parameters  $PAR$ ,  $T_{water}$ , and  $Q$ .

| Parameter                          | Cluster | Min.  | 25-p  | Median | 75-p  | Max. | Fraction of significant correlations ( $n_{sign.}/n_{total}$ ) |
|------------------------------------|---------|-------|-------|--------|-------|------|----------------------------------------------------------------|
| $r_{\alpha_{realized}, PAR}$       | A       | -0.97 | -0.42 | 0.02   | 0.13  | 0.77 | 15.4% (2/13)                                                   |
|                                    | B       | -0.80 | -0.21 | 0.02   | 0.47  | 0.80 | 20.0% (7/35)                                                   |
|                                    | C       | 0.38  | 0.76  | 0.85   | 0.93  | 0.98 | 89.5% (17/19)                                                  |
|                                    | D       | -0.70 | 0.27  | 0.48   | 0.55  | 0.95 | 19.2% (5/26)                                                   |
|                                    | E       | -0.28 | 0.18  | 0.41   | 0.61  | 0.85 | 14.7% (5/34)                                                   |
| $r_{\alpha_{realized}, T_{water}}$ | A       | -0.62 | -0.23 | 0.00   | 0.18  | 0.73 | 7.7% (1/13)                                                    |
|                                    | B       | -0.88 | -0.39 | -0.22  | 0.13  | 0.68 | 14.3% (5/35)                                                   |
|                                    | C       | -0.53 | 0.43  | 0.58   | 0.67  | 0.87 | 30.0% (6/20)                                                   |
|                                    | D       | -0.90 | -0.16 | 0.00   | 0.35  | 0.83 | 18.5% (5/27)                                                   |
|                                    | E       | -0.73 | -0.38 | -0.08  | 0.05  | 0.52 | 10.8% (4/37)                                                   |
| $r_{\alpha_{realized}, Q}$         | A       | -0.63 | -0.38 | -0.13  | 0.18  | 0.48 | 0.0% (0/3)                                                     |
|                                    | B       | -0.43 | -0.10 | 0.22   | 0.53  | 0.97 | 9.1% (1/11)                                                    |
|                                    | C       | -0.65 | -0.05 | -0.03  | -0.02 | 0.00 | 0.0% (0/5)                                                     |
|                                    | D       | -0.43 | 0.29  | 0.40   | 0.61  | 0.72 | 20.0% (3/15)                                                   |
|                                    | E       | -0.62 | -0.02 | 0.61   | 0.67  | 0.93 | 35.0% (7/20)                                                   |

**Table S4.** Overview of correlation coefficients of Chl-*a* and the physical parameters *PAR*, *T<sub>water</sub>*, and *Q*.

| Parameter              | Cluster | Min.  | 25-p  | Median | 75-p  | Max.  | Fraction of significant correlations ( $n_{sign.}/n_{total}$ ) |
|------------------------|---------|-------|-------|--------|-------|-------|----------------------------------------------------------------|
| $r_{Chl-a, PAR}$       | A       | -0.98 | -0.10 | 0.10   | 0.15  | 0.38  | 7.7% (1/13)                                                    |
|                        | B       | -0.95 | -0.18 | 0.18   | 0.46  | 0.93  | 25.7% (9/35)                                                   |
|                        | C       | 0.33  | 0.79  | 0.87   | 0.94  | 0.98  | 84.2% (16/19)                                                  |
|                        | D       | -0.60 | 0.26  | 0.52   | 0.70  | 0.93  | 34.6% (9/26)                                                   |
|                        | E       | -0.38 | 0.28  | 0.55   | 0.73  | 0.92  | 38.2% (13/34)                                                  |
| $r_{Chl-a, T_{water}}$ | A       | -0.70 | 0.00  | 0.47   | 0.65  | 0.77  | 23.1% (3/13)                                                   |
|                        | B       | -0.95 | -0.44 | 0.05   | 0.45  | 0.85  | 28.6% (10/35)                                                  |
|                        | C       | -0.23 | 0.57  | 0.70   | 0.79  | 0.90  | 55.0% (11/20)                                                  |
|                        | D       | -0.87 | -0.10 | 0.20   | 0.44  | 0.90  | 25.9% (7/27)                                                   |
|                        | E       | -0.73 | -0.23 | 0.03   | 0.32  | 0.68  | 13.5% (5/37)                                                   |
| $r_{Chl-a, Q}$         | A       | -0.77 | -0.71 | -0.65  | -0.59 | -0.53 | 33.3% (1/3)                                                    |
|                        | B       | -0.53 | -0.26 | 0.12   | 0.42  | 0.97  | 9.1% (1/11)                                                    |
|                        | C       | -0.45 | -0.35 | -0.13  | -0.10 | -0.07 | 0.0% (0/5)                                                     |
|                        | D       | -0.40 | 0.19  | 0.35   | 0.53  | 0.80  | 6.7% (1/15)                                                    |
|                        | E       | -0.63 | 0.12  | 0.33   | 0.53  | 0.78  | 15.0% (3/20)                                                   |

**Table S5.** Summary statistics of river network properties and catchment characteristics differentiated by the five clusters.

| Cluster |        | $L_{river}$<br>(km) | $d_{lake}$<br>(km) | $\tau_{lakes}$<br>(days/km) | $f_{agric}$<br>(%) | $f_{forest}$<br>(%) | $pdens$<br>(inhab./km <sup>2</sup> ) |
|---------|--------|---------------------|--------------------|-----------------------------|--------------------|---------------------|--------------------------------------|
| A       | Min    | 8                   | 0.00               | 1.05                        | 45                 | 27                  | 19.3                                 |
|         | 25-p   | 26                  | 0.65               | 4.72                        | 46                 | 37                  | 39.2                                 |
|         | Median | 56                  | 2.07               | 13.04                       | 48                 | 46                  | 59.1                                 |
|         | 75-p   | 61                  | 3.09               | 39.16                       | 58                 | 48                  | 59.4                                 |
|         | Max    | 820                 | 32.15              | 106.66                      | 69                 | 49                  | 59.7                                 |
| B       | Min    | 15                  | 0.02               | 0.00                        | 18                 | 29                  | 31.9                                 |
|         | 25-p   | 54                  | 3.42               | 4.54                        | 42                 | 39                  | 86.3                                 |
|         | Median | 120                 | 11.14              | 13.47                       | 46                 | 42                  | 109.4                                |
|         | 75-p   | 219                 | 25.64              | 17.6                        | 48                 | 46                  | 148.3                                |
|         | Max    | 499                 | 70.05              | 137.26                      | 60                 | 78                  | 301.0                                |
| C       | Min    | 5                   | 0.77               | 0.00                        | 43                 | 32                  | 87.4                                 |
|         | 25-p   | 171                 | 9.74               | 0.79                        | 45                 | 35                  | 136.0                                |
|         | Median | 295                 | 21.68              | 2.38                        | 50                 | 39                  | 145.5                                |
|         | 75-p   | 814                 | 50.78              | 4.71                        | 56                 | 44                  | 158.7                                |
|         | Max    | 1007                | 64.77              | 13.47                       | 59                 | 45                  | 173.0                                |
| D       | Min    | 5                   | 0.06               | 0.00                        | 29                 | 11                  | 42.0                                 |
|         | 25-p   | 62                  | 4.46               | 0.35                        | 42                 | 37                  | 133.1                                |
|         | Median | 141                 | 39.22              | 2.25                        | 50                 | 39                  | 176.6                                |
|         | 75-p   | 363                 | 61.90              | 9.53                        | 54                 | 45                  | 243.6                                |
|         | Max    | 669                 | 123.63             | 16.62                       | 86                 | 64                  | 437.0                                |
| E       | Min    | 11                  | 2.40               | 0.00                        | 46                 | 13                  | 40.8                                 |
|         | 25-p   | 65                  | 13.58              | 0.58                        | 56                 | 25                  | 94.8                                 |
|         | Median | 151                 | 22.93              | 2.43                        | 61                 | 31                  | 122.9                                |
|         | 75-p   | 250                 | 31.64              | 7.23                        | 67                 | 36                  | 160.4                                |
|         | Max    | 706                 | 139.49             | 28.68                       | 82                 | 40                  | 278.5                                |

## References

- Dodds, W. K., Jones, J. R., and Welch, E. B.: Suggested classification of stream trophic state: distributions of temperate stream types by chlorophyll, total nitrogen, and phosphorus, *Water research*, 32, 1455–1462, [https://doi.org/10.1016/S0043-1354\(97\)00370-9](https://doi.org/10.1016/S0043-1354(97)00370-9), 1998.
- 5 Graeber, D., McCarthy, M. J., Shatwell, T., Borchardt, D., Jeppesen, E., Søndergaard, M., Lauridsen, T. L., and Davidson, T. A.: Consistent stoichiometric long-term relationships between nutrients and chlorophyll-a across shallow lakes, *Nature Communications*, 15, 809, <https://doi.org/10.1038/s41467-024-45115-3>, 2024.
- Guildford, S. J. and Hecky, R. E.: Total nitrogen, total phosphorus, and nutrient limitation in lakes and oceans: Is there a common relationship?, *Limnology and oceanography*, 45, 1213–1223, <https://doi.org/10.4319/lo.2000.45.6.1213>, 2000.
- 10 Lehner, B. and Grill, G.: Global river hydrography and network routing: baseline data and new approaches to study the world's large river systems, *Hydrological Processes*, 27, 2171–2186, <https://doi.org/https://doi.org/10.1002/hyp.9740>, 2013.
